# Supplementary material for: Electrochemical Immunosensor for the Early Detection of Rheumatoid Arthritis Biomarker: Anti-Cyclic Citrullinated Peptide Antibody in Human Serum Based on Avidin-Biotin System
Source: MDPI journal article supplement (doi:10.3390/s21010124), 2020-12-28
Supplement: s1 [file s1]

Article

# Electrochemical Immunosensor for the Early Detection of Rheumatoid Arthritis Biomarker: Anti-Cyclic Citrullinated Peptide Antibody in Human Serum Based on Avidin-Biotin System

Somasekhar R. Chinnadayala <sup>1</sup> and Sungbo Cho <sup>1,2,\*</sup>

<sup>1</sup> Department of Electronic Engineering, Gachon University, 1342 Seongnamdaero, Seongnam-si, Gyeonggi-do 13120, Korea; ssreddy@gachon.ac.kr

<sup>2</sup> Department of Health Science and Technology, GAIHST, Gachon University, Incheon 21999, Korea

\* Correspondence: [sbcho@gachon.ac.kr](mailto:sbcho@gachon.ac.kr); Tel.: +82-(31)-750-5321

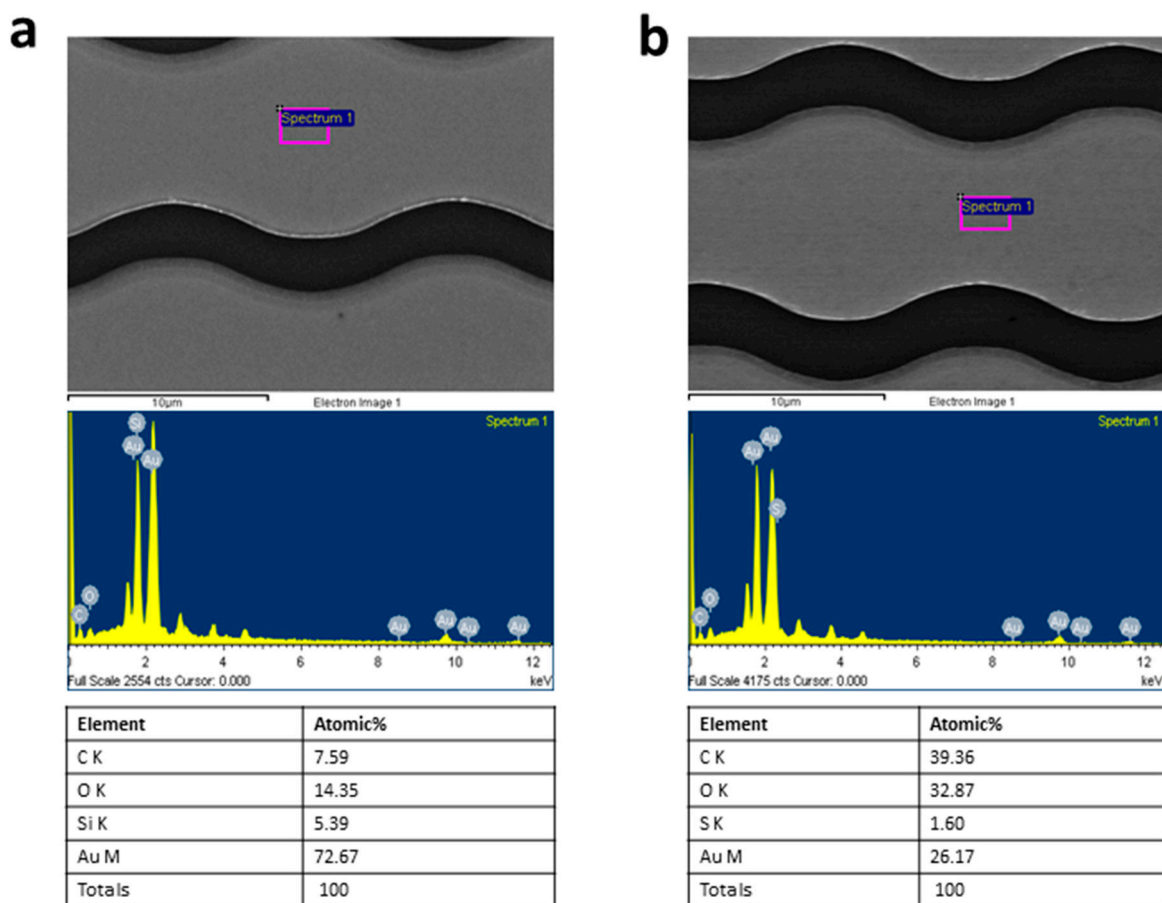

**Figure S1.** Energy dispersive x-ray spectroscopy of the bare ICE (a) and the 6-Mercaptohexanoic acid modified ICE surface (b).

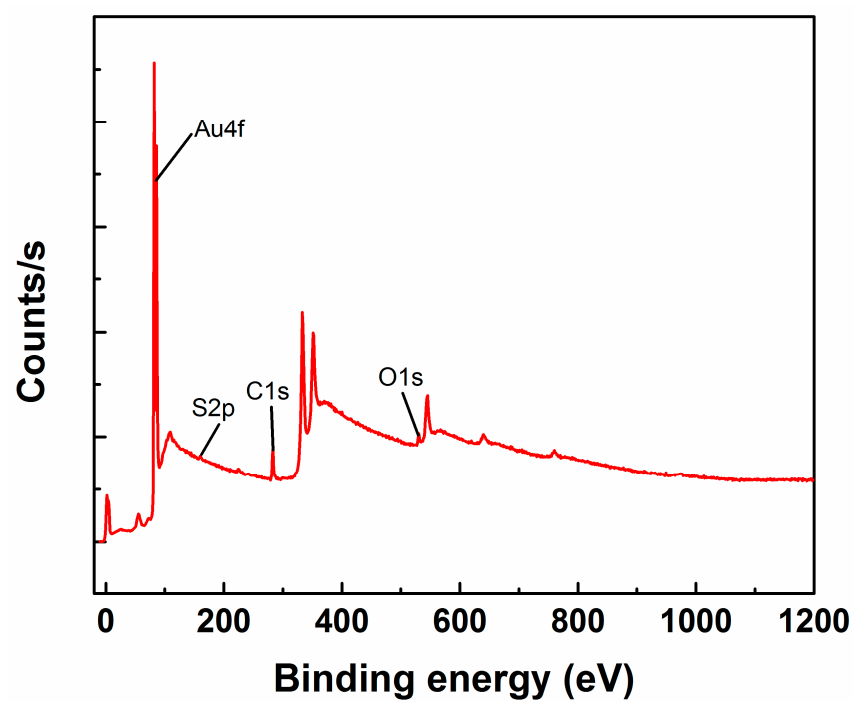

**Figure S2.** X-ray photoelectron spectroscopy survey spectra of the 6-mercaptopropionic acid functionalized on the electrode surface.
